# Supplementary material for: GABAB receptor signaling in the caudate putamen is involved in binge-like consumption during a high fat diet in mice
Source: PubMed Central journal article supplement (PMC8481241; doi:10.1038/s41598-021-98590-9), 2021-09-29
Supplement: 41598_2021_98590_MOESM1_ESM.pdf [file 41598_2021_98590_MOESM1_ESM.pdf]

**GABA<sub>B</sub> receptor signaling in the caudate putamen is involved in binge-like consumption during a high fat diet in mice**

<sup>1</sup>Runan Sun (sunrunan1995@med.nagoya-u.ac.jp)

<sup>1,2,\*</sup>Taku Tsunekawa (tsune-ta@med.nagoya-u.ac.jp)

<sup>1</sup>Tomonori Hirose (hirose-tomonori@med.nagoya-u.ac.jp)

<sup>1</sup>Hiroshi Yaginuma (h-yaginuma@med.nagoya-u.ac.jp)

<sup>1</sup>Keigo Taki (k-taki@med.nagoya-u.ac.jp)

<sup>1,2</sup>Akira Mizoguchi (mizoguchi.akira@med.nagoya-u.ac.jp)

<sup>1</sup>Takashi Miyata (miyata.takashi@med.nagoya-u.ac.jp)

<sup>1</sup>Tomoko Kobayashi (kobayashi.tomoko@med.nagoya-u.ac.jp)

<sup>1</sup>Mariko Sugiyama (sugiyama.mariko@med.nagoya-u.ac.jp)

<sup>1</sup>Takeshi Onoue (t-onoue@med.nagoya-u.ac.jp)

<sup>1</sup>Hiroshi Takagi (htakagi@med.nagoya-u.ac.jp)

<sup>1</sup>Daisuke Hagiwara (d-hagiwara@med.nagoya-u.ac.jp)

<sup>1</sup>Yoshihiro Ito (yoshi716@med.nagoya-u.ac.jp)

<sup>1</sup>Shintaro Iwama (siwama@med.nagoya-u.ac.jp)

<sup>1</sup>Hidetaka Suga (sugahide@med.nagoya-u.ac.jp)

<sup>1,3</sup>Ryoichi Banno (ryouichi@med.nagoya-u.ac.jp)

<sup>4</sup>Bernhard Bettler (bernhard.bettler@unibas.ch)

<sup>1,#,\*</sup>Hiroshi Arima (arima105@med.nagoya-u.ac.jp)

<sup>1</sup>Department of Endocrinology and Diabetes, Nagoya University Graduate School of Medicine, 65 Tsurumai-cho, Showa-ku, Nagoya, 466-8560, Japan

<sup>2</sup>Department of Endocrinology and Diabetes, Ichinomiya Municipal Hospital, 2-2-22, Bunkyo, Ichinomiya, 491-8558, Japan

<sup>3</sup>Research Center of Health, Physical Fitness and Sports, Nagoya University, Nagoya, 464-8601, Japan

<sup>4</sup>Department of Biomedicine, University of Basel, Basel CH-4056, Switzerland

#Lead Contact

\*Authors for correspondence:

Department of Endocrinology and Diabetes, Nagoya University Graduate School of

Medicine, 65 Tsurumai-cho, Showa-ku, Nagoya 466-8560,

Japan. Phone: +81-52-744-2142, Fax: +81-52-744-2206

Email: arima105med.nagoya-u.ac.jp (HA)

tsune-ta@med.nagoya-u.ac.jp (TT)

## Supplemental Figure 1.

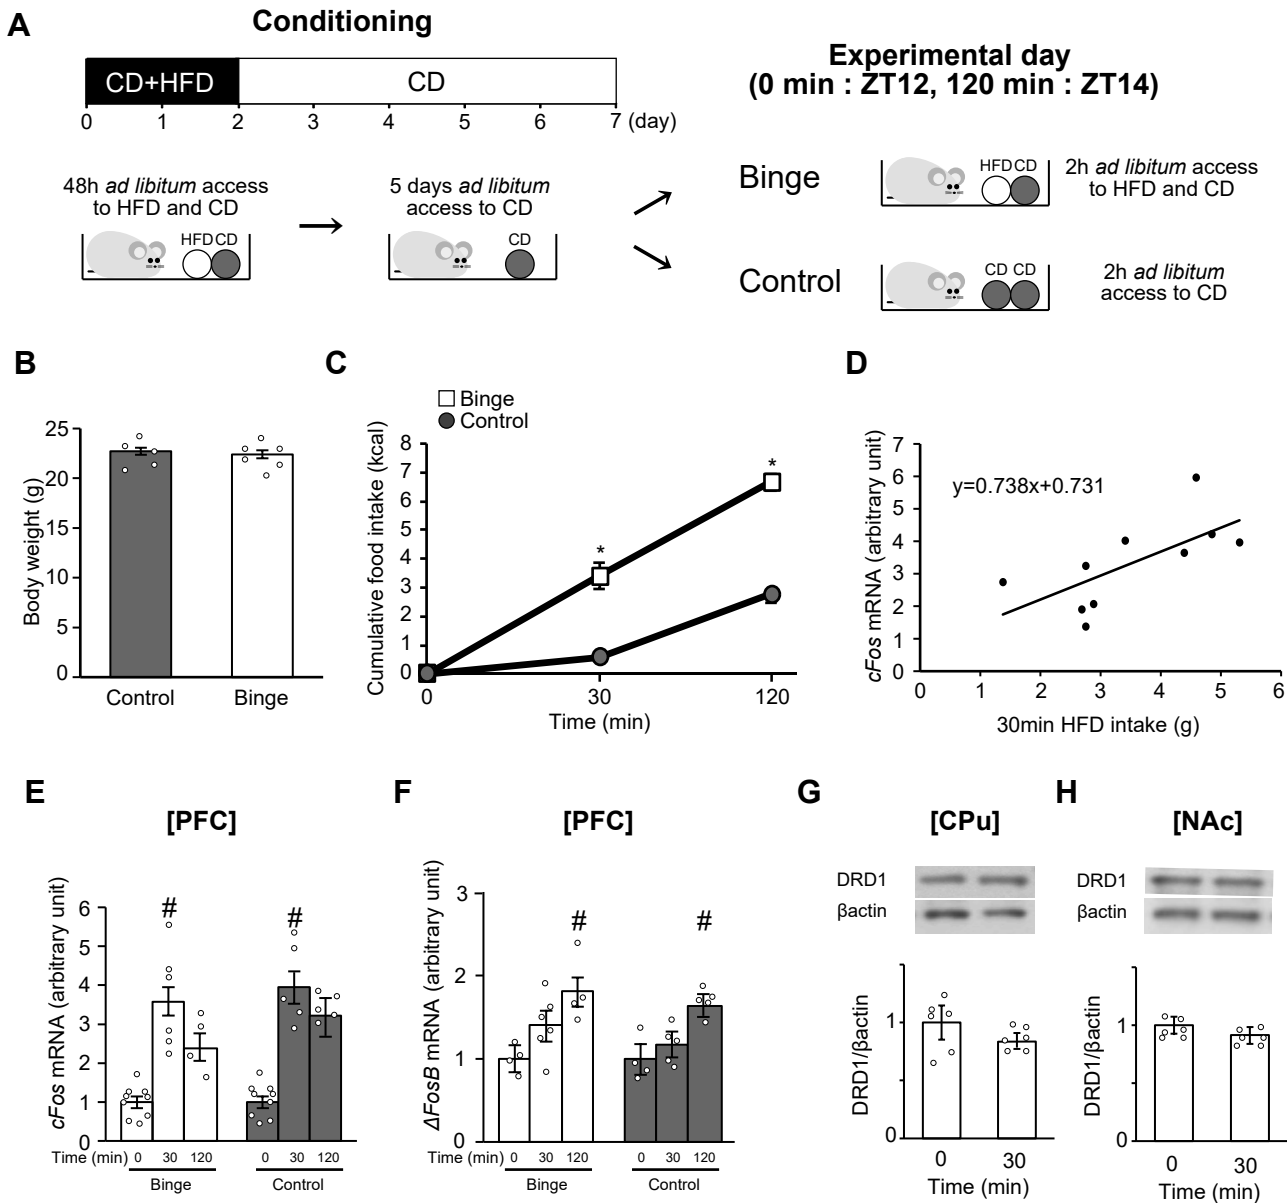

### Supplemental Figure 1. Intermittent access to a HFD induces binge-like eating with activation of neurons in the striatum related to Figure 1.

(A) Diagram of the experimental protocol for this study. The figure image was drawn using PowerPoint 2017 (Microsoft, USA). (B) Body weights of wild-type (WT) mice in cont and binge groups at baseline (zeitgeber time [ZT] 12) of each experimental day. (C) Food intake of mice on a chow diet (CD) in the control group and a high fat diet (HFD) in the binge group during zeitgeber times 12 to 14 (ZT12, ZT14) in WT mice. (D) Relationship of cFos and HFD consumption at 30 min in WT mice of the binge group. (E and F) The mRNA expression levels of cFos (E) and  $\Delta$ FosB (F) in the prefrontal cortex (PFC) of mice in binge and control groups. (G and H) The dopamine receptor d1 (drd1) expression in the caudate putamen (CPu) (G) and nucleus accumbens (NAc) (H) of mice in the binge group. All values are mean  $\pm$  SEM. Statistical analyses were performed using Pearson's correlation coefficient (D), an unpaired t-test (B, G and H), two-way factorial analysis of variance (ANOVA) assessed by repeated measures (C), or two-way factorial ANOVA (E and F) followed by Sidak's post-hoc test. \* $p < 0.05$  versus control. # $p < 0.05$  versus 0 min in WT mice. See also Supplemental Table 2 for details on statistics.

## Supplemental Figure 2.

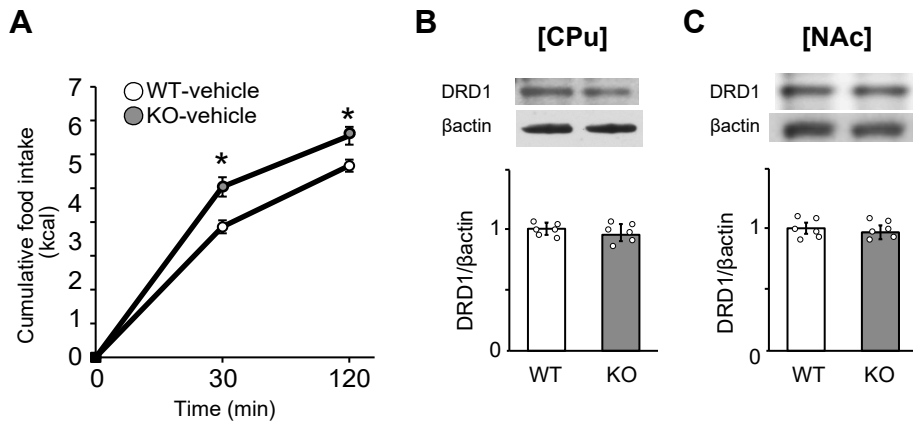

### Supplemental Figure 2. GABABR deficiency in striatum neurons increases binge-like eating with neural activation in the CPu related to Figure 2.

(A) Food intake of wild-type (WT) and knockout (KO) mice on a high fat diet (HFD) in the binge group during zeitgeber times (ZT) 12 to 14. (B and C) The dopamine receptor d1 (*drd1*) expression in the caudate putamen (CPu) (B) and nucleus accumbens (NAc) (C) in WT and KO mice at 30 min on a HFD in the binge group. All values are mean  $\pm$  SEM. Statistical analyses were performed using two-way factorial analysis of variance (ANOVA) assessed by repeated measures followed by Sidak's post-hoc test (A) or an unpaired t-test (B and C). \* $p < 0.05$  versus WT mice. See also Supplemental Table 2 for details on statistics. GABABR, gamma-aminobutyric acid type B receptor

### Supplemental Figure 3.

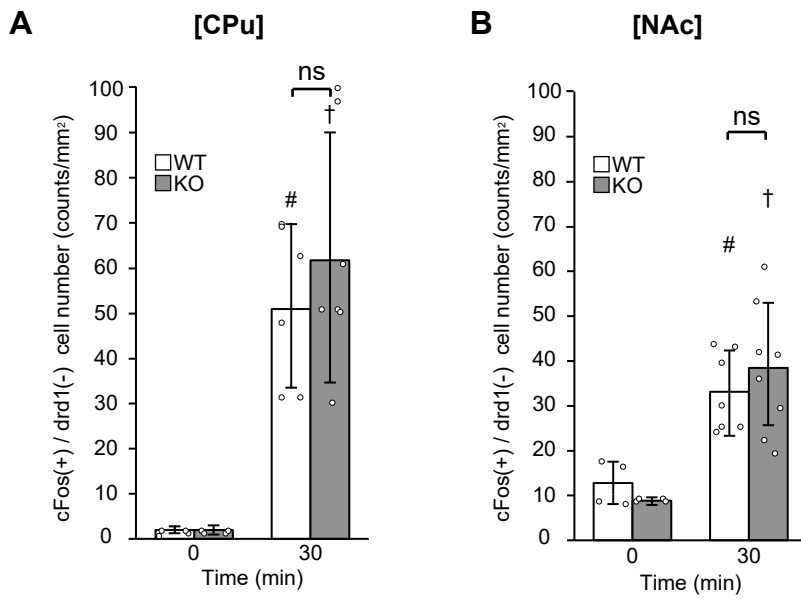

### Supplemental Figure 3. GABABR deficiency in striatum neurons has no effect on expression of cFos +/drd1- cells in CPu neurons related to Figure 3.

(A and B) cFos-positive cells in dopamine receptor d1 (drd1)-negative neurons (cFos+/drd1-) in the caudate putamen (CPu) (A) and nucleus accumbens (NAc) (B) of wild-type (WT) and knockout (KO) mice in the binge group. All values are mean  $\pm$  SEM. The statistical analysis was performed using two-way factorial analysis of variance (ANOVA) followed by Sidak's post-hoc test (A and B). ns: not significant. #p < 0.05 versus 0 min in WT mice. †p < 0.05 versus 0 min in KO mice. See also Supplemental Table 2 for details on statistics. GABABR, gamma-aminobutyric acid type B receptor

## Supplemental Figure 4.

A

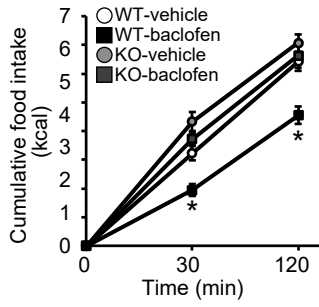

### Supplemental Figure 4. Baclofen suppresses binge-like eating during a HFD with inhibition of GABABR signaling in the CPu related to Figure 4.

Intake of a high fat diet (HFD) during zeitgeber times [ZT] 12 to 14 in wild-type (WT) and knockout (KO) mice in the binge group treated with baclofen and vehicle. All values are mean  $\pm$  SEM. The statistical analysis was performed using two-way factorial analysis of variance (ANOVA) assessed by repeated measures followed by Sidak's post-hoc test. \* $p < 0.05$  versus control. See also Supplemental Table 2 for details on statistics. GABABR, gamma-aminobutyric acid type B receptor

## Supplemental Figure 5.

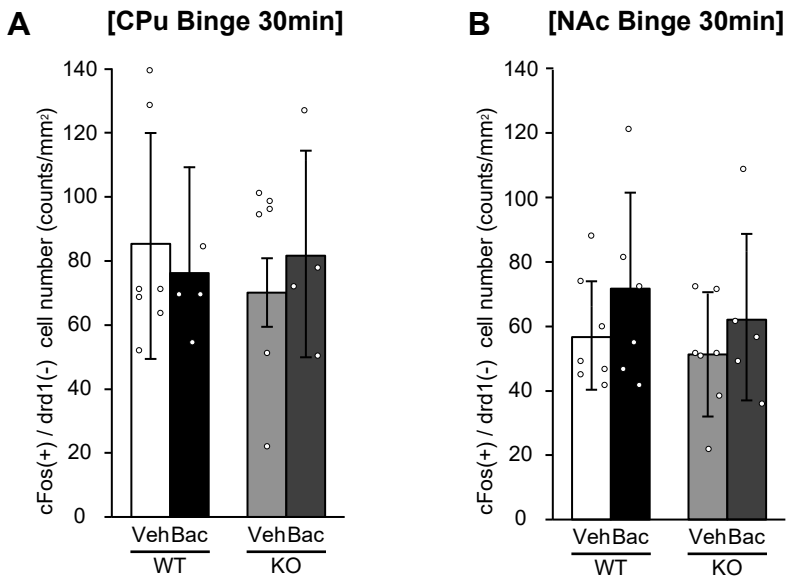

### Supplemental Figure 5. Baclofen has no effect on cFos+/drd1- cell expression in the CPu in both WT and KO mice related to Figure 6.

(A and B) cFos-positive cells in dopamine receptor d1 (drd1)-negative neurons (cFos+/drd1-) in the caudate putamen (CPu) (A) and nucleus accumbens (NAc) (B) of wild-type (WT) and knockout (KO) mice at 30 min on a HFD in the binge group. All values are mean  $\pm$  SEM. Statistical analyses were performed using two-way factorial analysis of variance (ANOVA) followed by Sidak's post-hoc test (A and B). veh: vehicle, bac: baclofen. See also Supplemental Table 2 for details on statistics.



## Supplemental Figure 6. Whole western immunoblots.

Figure 1C

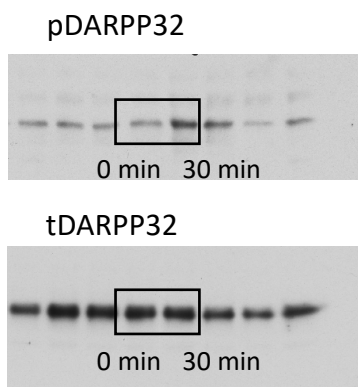

Figure 1D

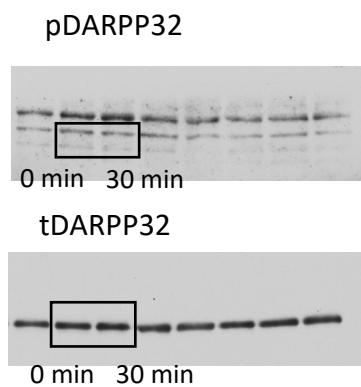

Figure 1G

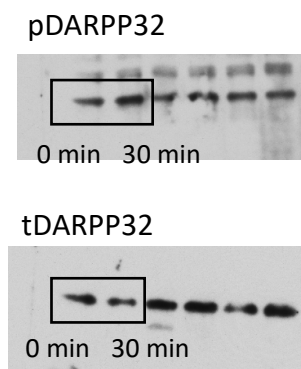

Figure 1H

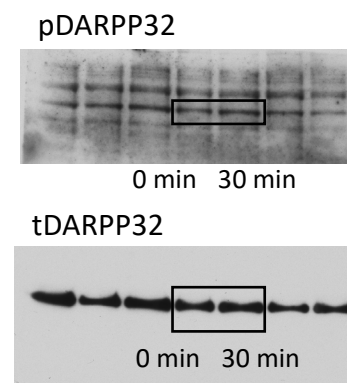

Figure 2C

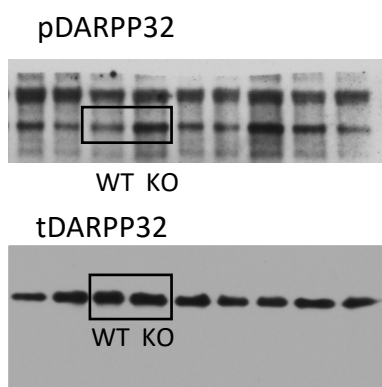

Figure 2F

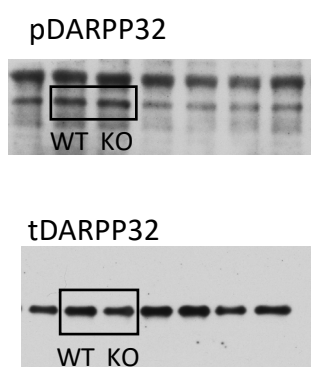

Figure 4C

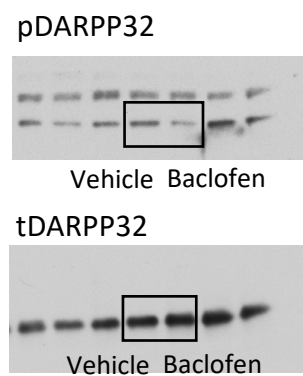

Figure 4F

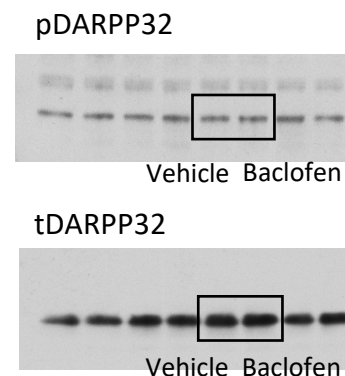

Figure 5C

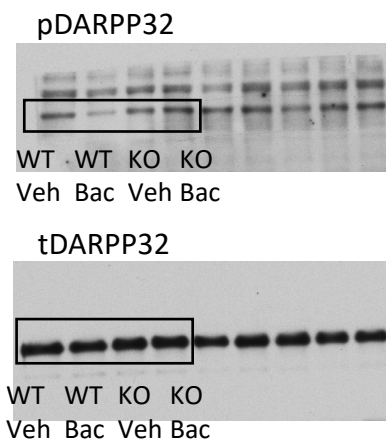

Figure 5F

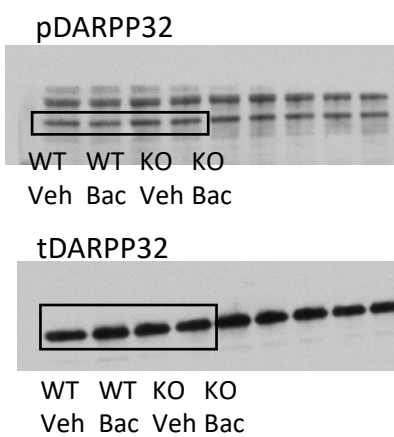

Figure S1G

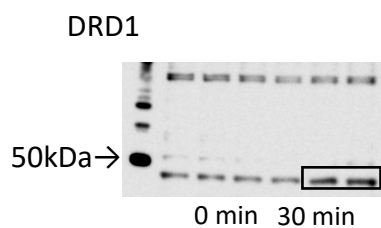

Figure S1H

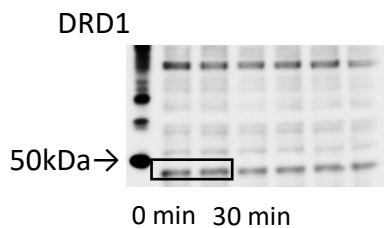

Figure S2B

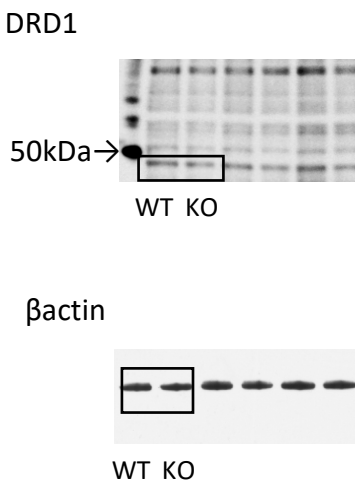

Figure S2C

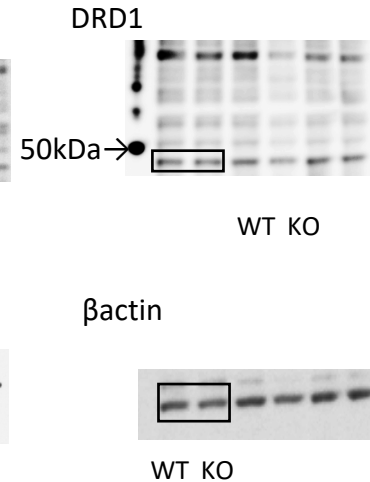

**Supplemental Table 1. List of qRT-PCR primers used in this study.**

| Gene         | Common abbreviation | Forward primer (5'→3') | Reverse primer (5'→3')  |
|--------------|---------------------|------------------------|-------------------------|
| <i>Fos</i>   | cFos                | CTGTCAACACACAGGACTTTT  | AGGAGATAGCTGCTCTACTTTG  |
| <i>Fosb</i>  | ΔFosB               | AGGCAGAGCTGGAGTCGGAGAT | GCCGAGGACTTGAACTTCACTCG |
| <i>Gapdh</i> | GAPDH               | AGGTCGGTGTGAACGGATTTG  | TGTAGACCATGTAGTTGAGGTCA |

## Supplemental Table 2. The details of statistics used in this study.

| Figure | Panel                 | Number of sample                                                                                           | Test used               | F/t/p value and degrees of freedom (df)                                                                                                                                                                      | Post hoc test               | Significance                                                                                                                                                  |
|--------|-----------------------|------------------------------------------------------------------------------------------------------------|-------------------------|--------------------------------------------------------------------------------------------------------------------------------------------------------------------------------------------------------------|-----------------------------|---------------------------------------------------------------------------------------------------------------------------------------------------------------|
| 1A     | cFos mRNA             | Binge 0min = 6, Control 0min= 5<br>Binge 30min = 6, Control 30min= 4<br>Binge 120min = 5, Control120min= 5 | Two-way factorial ANOVA | Time: $F(2, 25) = 30.185, p < 0.05$<br>Group: $F(1, 25) = 7.945, p < 0.05$<br>Interaction: $F(2, 25) = 4.414, p < 0.05$<br><br>Binge: $F(2, 25) = 33.408, p < 0.05$<br>Control: $F(2, 25) = 5.401, p < 0.05$ | Sidak's multiple comparison | Binge vs Control (30 min), $p < 0.05$<br>0 min vs 30 min (Binge), $p < 0.05$<br>0 min vs 120 min (Binge), $p < 0.05$<br>0 min vs 30 min (Control), $p < 0.05$ |
| 1B     | $\Delta$ FosB mRNA    | Binge 0min = 8, Control 0min= 5<br>Binge 30min = 6, Control 30min= 4<br>Binge 120min = 5, Control120min= 4 | Two-way factorial ANOVA | Time: $F(2, 26) = 11.843, p < 0.05$<br>Group: $F(1, 26) = 5.188, p < 0.05$<br>Interaction: $F(2, 26) = 1.638, ns$<br><br>Binge: $F(2, 26) = 13.137, p < 0.05$                                                | Sidak's multiple comparison | 0 min vs 120 min (Binge), $p < 0.05$                                                                                                                          |
| 1C     | pDARPP32/<br>tDARPP32 | 0 min = 7, 30 min = 5                                                                                      | Unpaired t-test         | $t = -2.994, df = 10$                                                                                                                                                                                        |                             | 0 min vs 30 min, $p < 0.05$                                                                                                                                   |
| 1D     | pDARPP32/<br>tDARPP32 | 0 min = 6, 30 min = 6                                                                                      | Unpaired t-test         | $t = -0.160, df = 10$                                                                                                                                                                                        |                             | 0 min vs 30 min, $p = 0.876, ns$                                                                                                                              |
| 1E     | cFos mRNA             | Binge 0min = 6, Control 0min= 5<br>Binge 30min = 7, Control 30min= 5<br>Binge 120min = 5, Control120min= 4 | Two-way factorial ANOVA | Time: $F(2, 26) = 34.415, p < 0.05$<br>Group: $F(1, 26) = 27.569, p < 0.05$<br>Interaction: $F(2, 26) = 10.682, p < 0.05$<br><br>Binge: $F(2, 26) = 47.562, p < 0.05$                                        | Sidak's multiple comparison | Binge vs Control (30 min), $p < 0.05$<br>0 min vs 30 min (Binge), $p < 0.05$<br>0 min vs 120 min (Binge), $p < 0.05$                                          |
| 1F     | $\Delta$ FosB mRNA    | Binge 0min = 5, Control 0min= 5<br>Binge 30min = 7, Control 30min= 4<br>Binge 120min = 5, Control120min= 4 | Two-way factorial ANOVA | Time: $F(2, 24) = 6.283, p < 0.05$<br>Group: $F(1, 24) = 23.067, p < 0.05$<br>Interaction: $F(2, 24) = 3.084, ns$<br><br>Binge: $F(2, 24) = 9.956, p < 0.05$                                                 | Sidak's multiple comparison | 0 min vs 30 min (Binge), $p < 0.05$<br>0 min vs 120 min (Binge), $p < 0.05$                                                                                   |
| 1G     | pDARPP32/<br>tDARPP32 | 0 min = 7, 30 min = 7                                                                                      | Unpaired t-test         | $t = -2.344, df = 12$                                                                                                                                                                                        |                             | 0 min vs 30 min, $p < 0.05$                                                                                                                                   |
| 1H     | pDARPP32/<br>tDARPP32 | 0 min = 6, 30 min = 5                                                                                      | Unpaired t-test         | $t = 1.058, df = 9$                                                                                                                                                                                          |                             | 0 min vs 30 min, $p = 0.318, ns$                                                                                                                              |
| 2A     | cFos mRNA             | WT 0 min = 8, KO 0 min = 7,<br>WT 30 min = 8, KO 30 min = 7                                                | Two-way factorial ANOVA | Time: $F(1, 26) = 108.197, p < 0.05$<br>Group: $F(1, 26) = 8.510, p < 0.05$<br>Interaction: $F(1, 26) = 5.579, p < 0.05$<br><br>WT: $F(1, 26) = 34.627, p < 0.05$<br>KO: $F(1, 26) = 76.367, p < 0.05$       | Sidak's multiple comparison | 0 min vs 30 min (WT), $p < 0.05$<br>0 min vs 30 min (KO), $p < 0.05$<br>WT vs KO (30min), $p < 0.05$                                                          |
| 2B     | $\Delta$ FosB mRNA    | WT 0 min = 7, KO 0 min = 6,<br>WT 30 min = 7, KO 30 min = 6                                                | Two-way factorial ANOVA | Time: $F(1, 22) = 14.982, p < 0.05$<br>Group: $F(1, 22) = 16.762, p < 0.05$<br>Interaction: $F(1, 22) = 4.828, p < 0.05$<br><br>KO: $F(1, 22) = 17.095, p < 0.05$                                            | Sidak's multiple comparison | 0 min vs 30 min (KO), $p < 0.05$<br>WT vs KO (30min), $p < 0.05$                                                                                              |

|    |                              |                                                                                                                             |                         |                                                                                                                                                                                              |                             |                                                                                                                                                                  |
|----|------------------------------|-----------------------------------------------------------------------------------------------------------------------------|-------------------------|----------------------------------------------------------------------------------------------------------------------------------------------------------------------------------------------|-----------------------------|------------------------------------------------------------------------------------------------------------------------------------------------------------------|
| 2C | pDARPP32/<br>tDARPP32 30 min | WT = 6, KO = 8                                                                                                              | Unpaired t-test         | t = -2.610, df = 7.651                                                                                                                                                                       |                             | WT vs KO, p < 0.05                                                                                                                                               |
| 2D | cFos mRNA                    | WT 0 min = 5, KO 0 min = 5,<br>WT 30 min = 7, KO 30 min = 7                                                                 | Two-way factorial ANOVA | Time: F(1, 20) = 73.608, p < 0.05<br>Group: F(1, 20) = 0.201, ns<br>Interaction: F(1, 20) = 0.666, ns<br>WT: F(1, 20) = 44.140, p < 0.05<br>KO: F(1, 20) = 30.134, p < 0.05                  | Sidak's multiple comparison | 0 min vs 30 min (WT), p < 0.05<br>0 min vs 30 min (KO), p < 0.05                                                                                                 |
| 2E | $\Delta$ FosB mRNA           | WT 0 min = 5, KO 0 min = 5,<br>WT 30 min = 7, KO 30 min = 7                                                                 | Two-way factorial ANOVA | Time: F(1, 20) = 13.620, p < 0.05<br>Group: F(1, 20) = 0.20, ns<br>Interaction: F(1, 20) = 0.451, ns<br>WT: F(1, 20) = 9.515, p < 0.05<br>KO: F(1, 20) = 4.556, p < 0.05                     | Sidak's multiple comparison | 0 min vs 30 min (WT), p < 0.05<br>0 min vs 30 min (KO), p < 0.05                                                                                                 |
| 2F | pDARPP32/<br>tDARPP32 30 min | WT = 6, KO = 8                                                                                                              | Unpaired t-test         | t = -1.3327, df = 12                                                                                                                                                                         |                             | WT vs KO, p = 0.209, ns                                                                                                                                          |
| 3B | Cell counts                  | WT 0 min = 4, KO 0 min = 4,<br>WT 30 min = 7, KO 30 min = 7                                                                 | Two-way factorial ANOVA | Genotype: F(1, 18) = 21.597, p < 0.05<br>Time: F(1, 18) = 449.647, p < 0.05<br>Interaction: F(1, 18) = 24.767, p < 0.05                                                                      | Sidak's multiple comparison | WT 0 min vs WT 30 min, p < 0.05<br>KO 0 min vs KO 30 min, p < 0.05<br>WT 30 min vs KO 30 min, p < 0.05                                                           |
| 3D | Cell counts                  | WT 0 min = 4, KO 0 min = 4,<br>WT 30 min = 7, KO 30 min = 8                                                                 | Two-way factorial ANOVA | Genotype: F(1, 19) = 0.116, p = 0.738, ns<br>Time: F(1, 19) = 29.635, p < 0.05<br>Interaction: F(1, 19) = 0.493, p = 0.491, ns                                                               | Sidak's multiple comparison | WT 0 min vs WT 30 min, p < 0.05<br>KO 0 min vs KO 30 min, p < 0.05                                                                                               |
| 4A | cFos mRNA                    | Vehicle 0min = 10, Baclofen 0min = 4<br>Vehicle 30min = 10, Baclofen 30min = 9<br>Vehicle 120min = 10, Baclofen 120min = 6  | Two-way factorial ANOVA | Time: F(2, 43) = 15.781, p < 0.05<br>Group: F(1, 43) = 13.305, p < 0.05<br>Interaction: F(2, 43) = 3.790, p < 0.05<br>Vehicle: F(2, 43) = 24.573, p < 0.05<br>Baclofen: F(2, 43) = 1.740, ns | Sidak's multiple comparison | Vehicle vs Baclofen (30 min), p < 0.05<br>Vehicle vs Baclofen (120 min), p < 0.05<br>0 min vs 30 min (Vehicle), p < 0.05<br>0 min vs 120 min (Vehicle), p < 0.05 |
| 4B | $\Delta$ FosB mRNA           | Vehicle 0min = 12, Baclofen 0min = 4<br>Vehicle 30min = 10, Baclofen 30min = 11<br>Vehicle 120min = 10, Baclofen 120min = 6 | Two-way factorial ANOVA | Time: F(2, 47) = 4.766, p < 0.05<br>Group: F(1, 47) = 8.655, p < 0.05<br>Interaction: F(2, 47) = 1.320, ns<br>Vehicle: F(2, 47) = 8.310, p < 0.05<br>Baclofen: F(2, 47) = 0.977, ns          | Sidak's multiple comparison | Vehicle vs Baclofen (30 min), p < 0.05<br>Vehicle vs Baclofen (120 min), p < 0.05<br>0 min vs 120 min (Vehicle), p < 0.05                                        |
| 4C | pDARPP32/<br>tDARPP32 30 min | Vehicle = 9, Baclofen = 10                                                                                                  | Unpaired t-test         | t = 2.501, df = 17                                                                                                                                                                           |                             | Vehicle vs Baclofen, p < 0.05                                                                                                                                    |
| 4D | cFos mRNA                    | Vehicle 0min = 6, Baclofen 0min = 5<br>Vehicle 30min = 6, Baclofen 30min = 6<br>Vehicle 120min = 5, Baclofen 120min = 6     | Two-way factorial ANOVA | Time: F(2, 28) = 62.706, p < 0.05<br>Group: F(1, 28) = 1.434, ns<br>Interaction: F(2, 18) = 1.780, ns<br>Vehicle: F(2, 28) = 40.215, p < 0.05<br>Baclofen: F(2, 28) = 25.059, p < 0.05       | Sidak's multiple comparison | 0 min vs 30 min (Vehicle), p < 0.05<br>0 min vs 120 min (Vehicle), p < 0.05<br>0 min vs 30 min (Baclofen), p < 0.05<br>0 min vs 120 min (Baclofen), p < 0.05     |

|     |                              |                                                                                                                      |                                                |                                                                                                                                                                                                    |                             |                                                                                                                                                                      |
|-----|------------------------------|----------------------------------------------------------------------------------------------------------------------|------------------------------------------------|----------------------------------------------------------------------------------------------------------------------------------------------------------------------------------------------------|-----------------------------|----------------------------------------------------------------------------------------------------------------------------------------------------------------------|
| 4E  | $\Delta$ FosB mRNA           | Vehicle 0min = 5, Baclofen 0min= 5<br>Vehicle 30min = 6, Baclofen 30min= 6<br>Vehicle 120min = 5, Baclofen 120min= 6 | Two-way factorial ANOVA                        | Time: $F(2, 27) = 12.463, p < 0.05$<br>Group: $F(1, 27) = 0.64, ns$<br>Interaction: $F(2, 27) = 0.153, ns$<br><br>Vehicle : $F(2, 27) = 5.396, p < 0.05$<br>Baclofen: $F(2, 27) = 7.314, p < 0.05$ | Sidak's multiple comparison | 0 min vs 30 min (Vehicle), $p < 0.05$<br>0 min vs 120 min (Vehicle), $p < 0.05$<br>0 min vs 30 min (Baclofen), $p < 0.05$<br>0 min vs 120 min (Baclofen), $p < 0.05$ |
| 4F  | pDARPP32/<br>tDARPP32 30 min | Vehicle = 7, Baclofen = 7                                                                                            | Unpaired t-test                                | $t = 0.988, df = 12$                                                                                                                                                                               |                             | Vehicle vs Baclofen, $p < 0.342, ns$                                                                                                                                 |
| 5A  | cFos mRNA 30 min             | WT-vehicle = 16, WT-baclofen = 15,<br>KO-vehicle = 15, KO-baclofen = 10                                              | Two-way factorial ANOVA                        | Genotype: $F(1, 52) = 14.461, p < 0.05$<br>Treatment: $F(1, 52) = 6.105, p < 0.05$<br>Interaction: $F(1, 52) = 5.218, p < 0.05$                                                                    | Sidak's multiple comparison | WT-vehicle vs WT-baclofen, $p < 0.05$<br>WT-baclofen vs KO-baclofen, $p < 0.05$                                                                                      |
| 5B  | $\Delta$ FosB mRNA 30 min    | WT-vehicle = 14, WT-baclofen = 17,<br>KO-vehicle = 15, KO-baclofen = 10                                              | Two-way factorial ANOVA                        | Genotype: $F(1, 52) = 32.015, p < 0.05$<br>Treatment: $F(1, 52) = 4.969, p < 0.05$<br>Interaction: $F(1, 52) = 4.373, p < 0.05$                                                                    | Sidak's multiple comparison | WT-vehicle vs WT-baclofen, $p < 0.05$<br>WT-vehicle vs KO-vehicle, $p < 0.05$<br>WT-baclofen vs KO-baclofen, $p < 0.05$                                              |
| 5C  | pDARPP32/<br>tDARPP32 30 min | WT-vehicle = 6, WT-baclofen = 9,<br>KO-vehicle = 6, KO-baclofen = 6                                                  | Two-way factorial ANOVA                        | Genotype: $F(1, 23) = 12.487, p < 0.05$<br>Treatment: $F(1, 23) = 4.373, p < 0.05$<br>Interaction: $F(1, 23) = 5.514, p < 0.05$                                                                    | Sidak's multiple comparison | WT-vehicle vs WT-baclofen, $p < 0.05$<br>WT-baclofen vs KO-baclofen, $p < 0.05$                                                                                      |
| 5D  | cFos mRNA 30 min             | WT-vehicle = 6, WT-baclofen = 6,<br>KO-vehicle = 7, KO-baclofen = 5                                                  | Two-way factorial ANOVA                        | Genotype: $F(1, 20) = 0.157, ns$<br>Treatment: $F(1, 20) = 3.815, ns$<br>Interaction: $F(1, 20) = 0.434, ns$                                                                                       |                             |                                                                                                                                                                      |
| 5E  | $\Delta$ FosB mRNA 30 min    | WT-vehicle = 6, WT-baclofen = 6,<br>KO-vehicle = 7, KO-baclofen = 5                                                  | Two-way factorial ANOVA                        | Genotype: $F(1, 20) = 0.419, ns$<br>Treatment: $F(1, 20) = 1.959, ns$<br>Interaction: $F(1, 20) = 0.078, ns$                                                                                       |                             |                                                                                                                                                                      |
| 5F  | pDARPP32/<br>tDARPP32 30 min | WT-vehicle = 8, WT-baclofen = 8,<br>KO-vehicle = 6, KO-baclofen = 6                                                  | Two-way factorial ANOVA                        | Genotype: $F(1, 24) = 0.260, ns$<br>Treatment: $F(1, 24) = 0.006, ns$<br>Interaction: $F(1, 24) = 0.531, ns$                                                                                       |                             |                                                                                                                                                                      |
| 6B  | Cell counts                  | WT-vehicle = 7, WT-baclofen = 4,<br>KO-vehicle = 7, KO-baclofen = 4                                                  | Two-way factorial ANOVA                        | Genotype: $F(1, 18) = 57.057, p < 0.05$<br>Treatment: $F(1, 18) = 1.581, NS$<br>Interaction: $F(1, 18) = 8.184, p < 0.05$                                                                          | Sidak's multiple comparison | WT-vehicle vs WT-baclofen, $p < 0.05$<br>WT-vehicle vs KO-vehicle, $p < 0.05$<br>WT-baclofen vs KO-baclofen, $p < 0.05$                                              |
| 6D  | Cell counts                  | WT-vehicle = 7, WT-baclofen = 7,<br>KO-vehicle = 6, KO-baclofen = 5                                                  | Two-way factorial ANOVA                        | Genotype: $F(1, 21) = 3.017, ns$<br>Treatment: $F(1, 21) = 0.005, ns$<br>Interaction: $F(1, 21) = 0.402, ns$                                                                                       |                             |                                                                                                                                                                      |
| S1B | Body weight                  | Binge = 5, Control = 6                                                                                               | Unpaired t-test                                | $t = 0.581, df = 9$                                                                                                                                                                                |                             | Control vs Binge, $p < 0.576, ns$                                                                                                                                    |
| S1C | Food intake                  | Binge = 8, Control = 6                                                                                               | Two-way ANOVA assessed<br>by repeated measures | Time: $F(2, 24) = 724.546, p < 0.05$<br>Group: $F(1, 12) = 233.007, p < 0.05$<br>Interaction: $F(2, 24) = 116.692, p < 0.05$                                                                       | Sidak's multiple comparison | Binge vs Control (30 min), $p < 0.05$<br>Binge vs Control (120 min), $p < 0.05$                                                                                      |
| S1D | HFD intake                   | WT=10                                                                                                                | Pearson's correlation coefficient              | $r = 0.673, p < 0.05$                                                                                                                                                                              |                             |                                                                                                                                                                      |
| S1E | cFos mRNA                    | Binge 0min = 9, Control 0min= 9<br>Binge 30min = 6, Control 30min= 5<br>Binge 120min = 4, Control120min= 5           | Two-way factorial ANOVA                        | Time: $F(2, 32) = 48.977, p < 0.05$<br>Group: $F(1, 32) = 2.262, ns$<br>Interaction: $F(2, 32) = 0.969, ns$<br><br>Binge: $F(2, 32) = 21.725, p < 0.05$<br>Control: $F(2, 32) = 28.739, p < 0.05$  | Sidak's multiple comparison | 0 min vs 30 min (Binge), $p < 0.05$<br>0 min vs 30 min (Control), $p < 0.05$                                                                                         |

|     |                      |                                                                                                            |                                             |                                                                                                                                                                                                   |                             |                                                                                                                                                    |
|-----|----------------------|------------------------------------------------------------------------------------------------------------|---------------------------------------------|---------------------------------------------------------------------------------------------------------------------------------------------------------------------------------------------------|-----------------------------|----------------------------------------------------------------------------------------------------------------------------------------------------|
| S1F | $\Delta$ FosB mRNA   | Binge 0min = 4, Control 0min= 4<br>Binge 30min = 6, Control 30min= 5<br>Binge 120min = 4, Control120min= 5 | Two-way factorial ANOVA                     | Time: $F(2, 22) = 24.635, p < 0.05$<br>Group: $F(1, 22) = 3.250, ns$<br>Interaction: $F(2, 22) = 0.596, ns$<br><br>Binge: $F(2, 22) = 13.274, p < 0.05$<br>Control: $F(2, 22) = 11.967, p < 0.05$ | Sidak's multiple comparison | 0 min vs 120 min (Binge), $p < 0.05$<br>0 min vs 120 min (Control), $p < 0.05$                                                                     |
| S1G | DRD1/ $\beta$ actine | 0 min = 6, 30 min = 6                                                                                      | Unpaired t-test                             | $t = 0.802, df = 5.976$                                                                                                                                                                           |                             | 0 min vs 30 min, $p = 0.453, ns$                                                                                                                   |
| S1H | DRD1/ $\beta$ actine | 0 min = 6, 30 min = 6                                                                                      | Unpaired t-test                             | $t = 1.454, df = 10$                                                                                                                                                                              |                             | 0 min vs 30 min, $p = 0.177, ns$                                                                                                                   |
| S2A | Food intake          | WT = 11, KO = 5                                                                                            | Two-way ANOVA assessed by repeated measures | Time: $F(2, 28) = 638.689, p < 0.05$<br>Group: $F(1, 14) = 15.099, p < 0.05$<br>Interaction: $F(2, 28) = 6.042, p < 0.05$                                                                         | Sidak's multiple comparison | WT vs KO (30 min), $p < 0.05$<br>WT vs KO (120 min), $p < 0.05$                                                                                    |
| S2B | DRD1/ $\beta$ actine | WT = 6, KO = 6                                                                                             | Unpaired t-test                             | $t = 0.630, df = 10$                                                                                                                                                                              |                             | 0 min vs 30 min, $p = 0.543, ns$                                                                                                                   |
| S2C | DRD1/ $\beta$ actine | WT = 6, KO = 6                                                                                             | Unpaired t-test                             | $t = 0.225, df = 10$                                                                                                                                                                              |                             | 0 min vs 30 min, $p = 0.827, ns$                                                                                                                   |
| S3A | Cell counts          | WT 0 min = 4, KO 0 min = 4,<br>WT 30 min = 6, KO 30 min = 7                                                | Two-way factorial ANOVA                     | Genotype: $F(1, 17) = 0.317, ns$<br>Time: $F(1, 17) = 38.453, p < 0.05$<br>Interaction: $F(1, 17) = 0.317, ns$                                                                                    | Sidak's multiple comparison | WT 0 min vs WT 30 min, $p < 0.05$<br>KO 0 min vs KO 30 min, $p < 0.05$                                                                             |
| S3B | Cell counts          | WT 0 min = 4, KO 0 min = 4,<br>WT 30 min = 7, KO 30 min = 8                                                | Two-way factorial ANOVA                     | Genotype: $F(1, 19) = 0.017, ns$<br>Time: $F(1, 19) = 24.498, p < 0.05$<br>Interaction: $F(1, 19) = 0.927, ns$                                                                                    | Sidak's multiple comparison | WT 0 min vs WT 30 min, $p < 0.05$<br>KO 0 min vs KO 30 min, $p < 0.05$                                                                             |
| S4A | Food intake          | WT-vehicle = 9, WT-baclofen = 10,<br>KO-vehicle = 9, KO-baclofen = 7                                       | Two-way ANOVA assessed by repeated measures | Time: $F(2, 62) = 910.077, p < 0.05$<br>Treatment: $F(3, 31) = 16.012, p < 0.05$<br>Interaction: $F(6, 62) = 10.108, p < 0.05$                                                                    | Sidak's multiple comparison | WT-vehicle vs WT-baclofen (30 min), $p < 0.05$<br>WT-vehicle vs KO-vehicle (30 min), $p < 0.05$<br>WT-vehicle vs WT-baclofen (120 min), $p < 0.05$ |
| S5A | Cell counts          | WT-vehicle = 7, WT-baclofen = 4,<br>KO-vehicle = 6, KO-baclofen = 4                                        | Two-way factorial ANOVA                     | Genotype: $F(1, 17) = 0.02, p ns$<br>Treatment: $F(1, 17) = 0.178, ns$<br>Interaction: $F(1, 17) = 0.404, ns$                                                                                     |                             |                                                                                                                                                    |
| S5B | Cell counts          | WT-vehicle = 7, WT-baclofen = 7,<br>KO-vehicle = 6, KO-baclofen = 5                                        | Two-way factorial ANOVA                     | Genotype: $F(1, 21) = 1.487, ns$<br>Treatment: $F(1, 21) = 0.659, ns$<br>Interaction: $F(1, 21) = 0.015, ns$                                                                                      |                             |                                                                                                                                                    |
